# Supplementary material for: Bacteria evoke alarm behaviour in zebrafish
Source: PubMed Central journal article supplement (PMC6707203; doi:10.1038/s41467-019-11608-9), 2019-08-23
Supplement: 41467_2019_11608_MOESM1_ESM.pdf [file 41467_2019_11608_MOESM1_ESM.pdf]

**Bacteria evoke alarm behaviour in zebrafish**  
Chia et al.

Supplementary Information

**Supplementary Table 1. Bacterial strains tested**

| Lysate name | Genus/species                  | Strain ID |
|-------------|--------------------------------|-----------|
| Pseu        | <i>Pseudomonas aeruginosa</i>  | ZOR0057   |
| Koc         | <i>Kocuria sp</i>              | ZOR0020   |
| Sta1        | <i>Staphylococcus sp</i>       | ZOR0016   |
| Sta2        | <i>Staphylococcus sp</i>       | ZWU0021   |
| Ent         | <i>Enterococcus gallinarum</i> | NCDO 2313 |
| Vib1        | <i>Vibrio sp</i>               | ZWU0020   |
| Aer1        | <i>Aeromonas sp</i>            | ZOR0001   |
| Aer2        | <i>Aeromonas sp</i>            | ZOR0039   |
| Aer3        | <i>Aeromonas sp</i>            | ZOR0002   |
| Vib2        | <i>Vibrio sp</i>               | ZOR0035   |

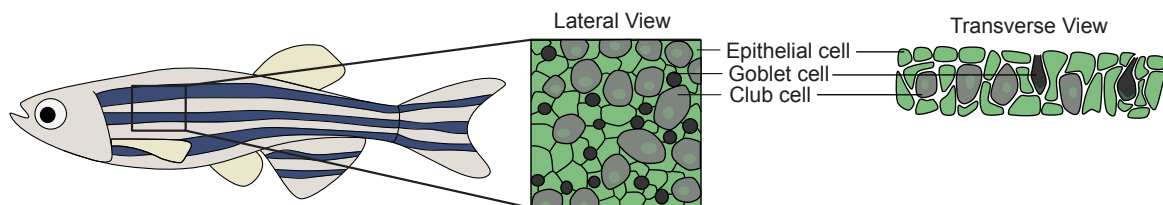

**Supplementary Fig. 1. Schematic diagram of cell types in the adult zebrafish skin.** Superficial epithelial cells and goblet cells are in contact with the surface, whereas club cells are not.

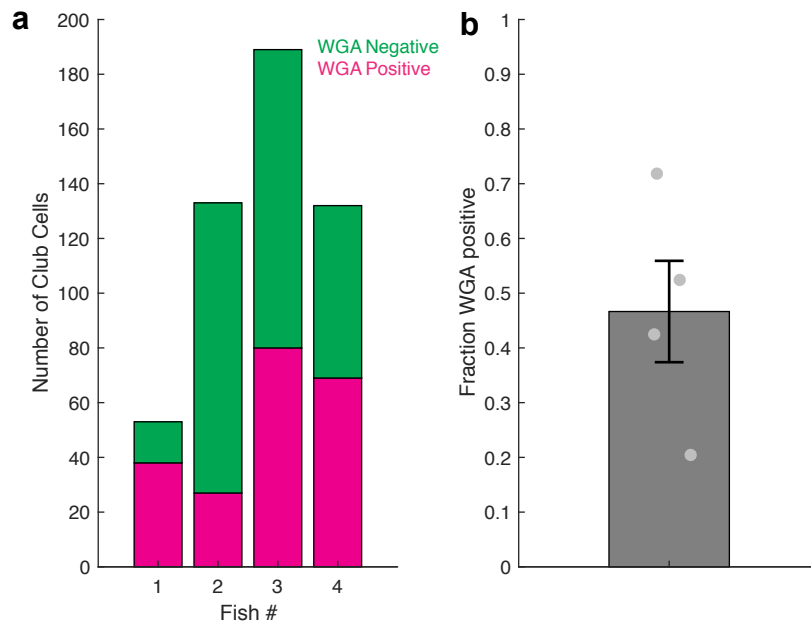

**Supplementary Fig. 2 Uptake of mucus by club cells.** **a** Number of club cells with (magenta) and without (green) Alexa594-WGA puncta, following 2 hour incubation in the lectin followed by 2 days in clean water. **b** Mean of the proportion of club cells with WGA puncta. Error bar indicates standard error of the mean.

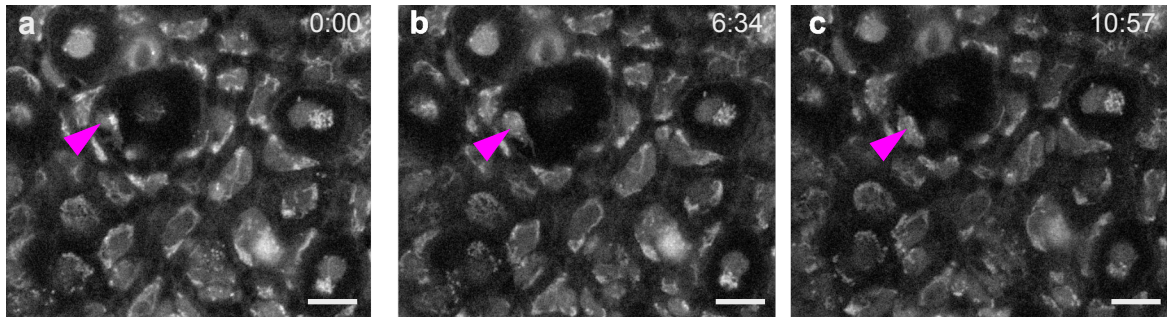

**Supplementary Fig. 3. A motile cell within a zebrafish club cell. a-c.** Three frames from a time-lapse recording of the skin of fish labelled with SYTO 9. The arrow indicates a cell that changes morphology.

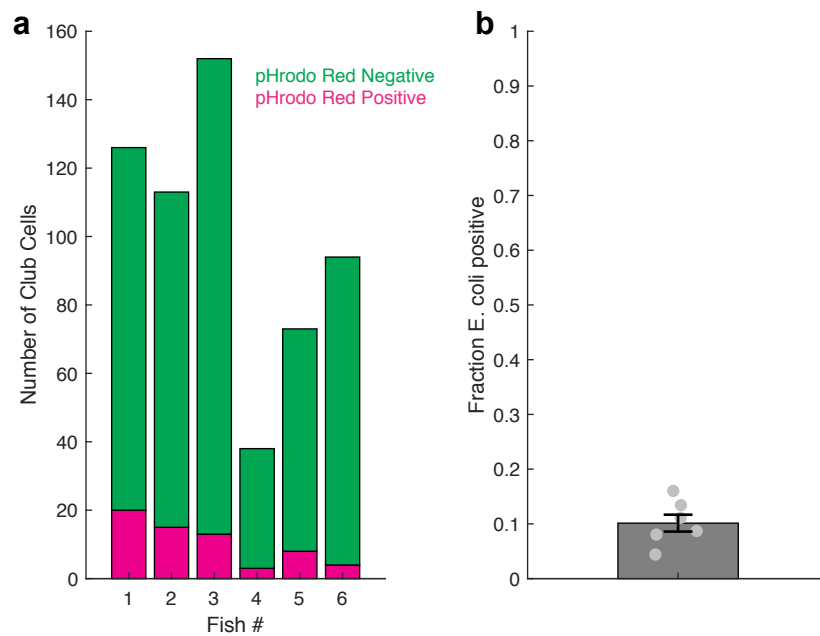

**Supplementary Fig. 4. Uptake of *E. coli* by club cells. a.** Number of club cells with (magenta) and without (green) diffuse cytoplasm label, following transient incubation in pHrodo Red labelled *E. coli*. **b.** Proportion of club cells with diffuse pHrodo Red fluorescence

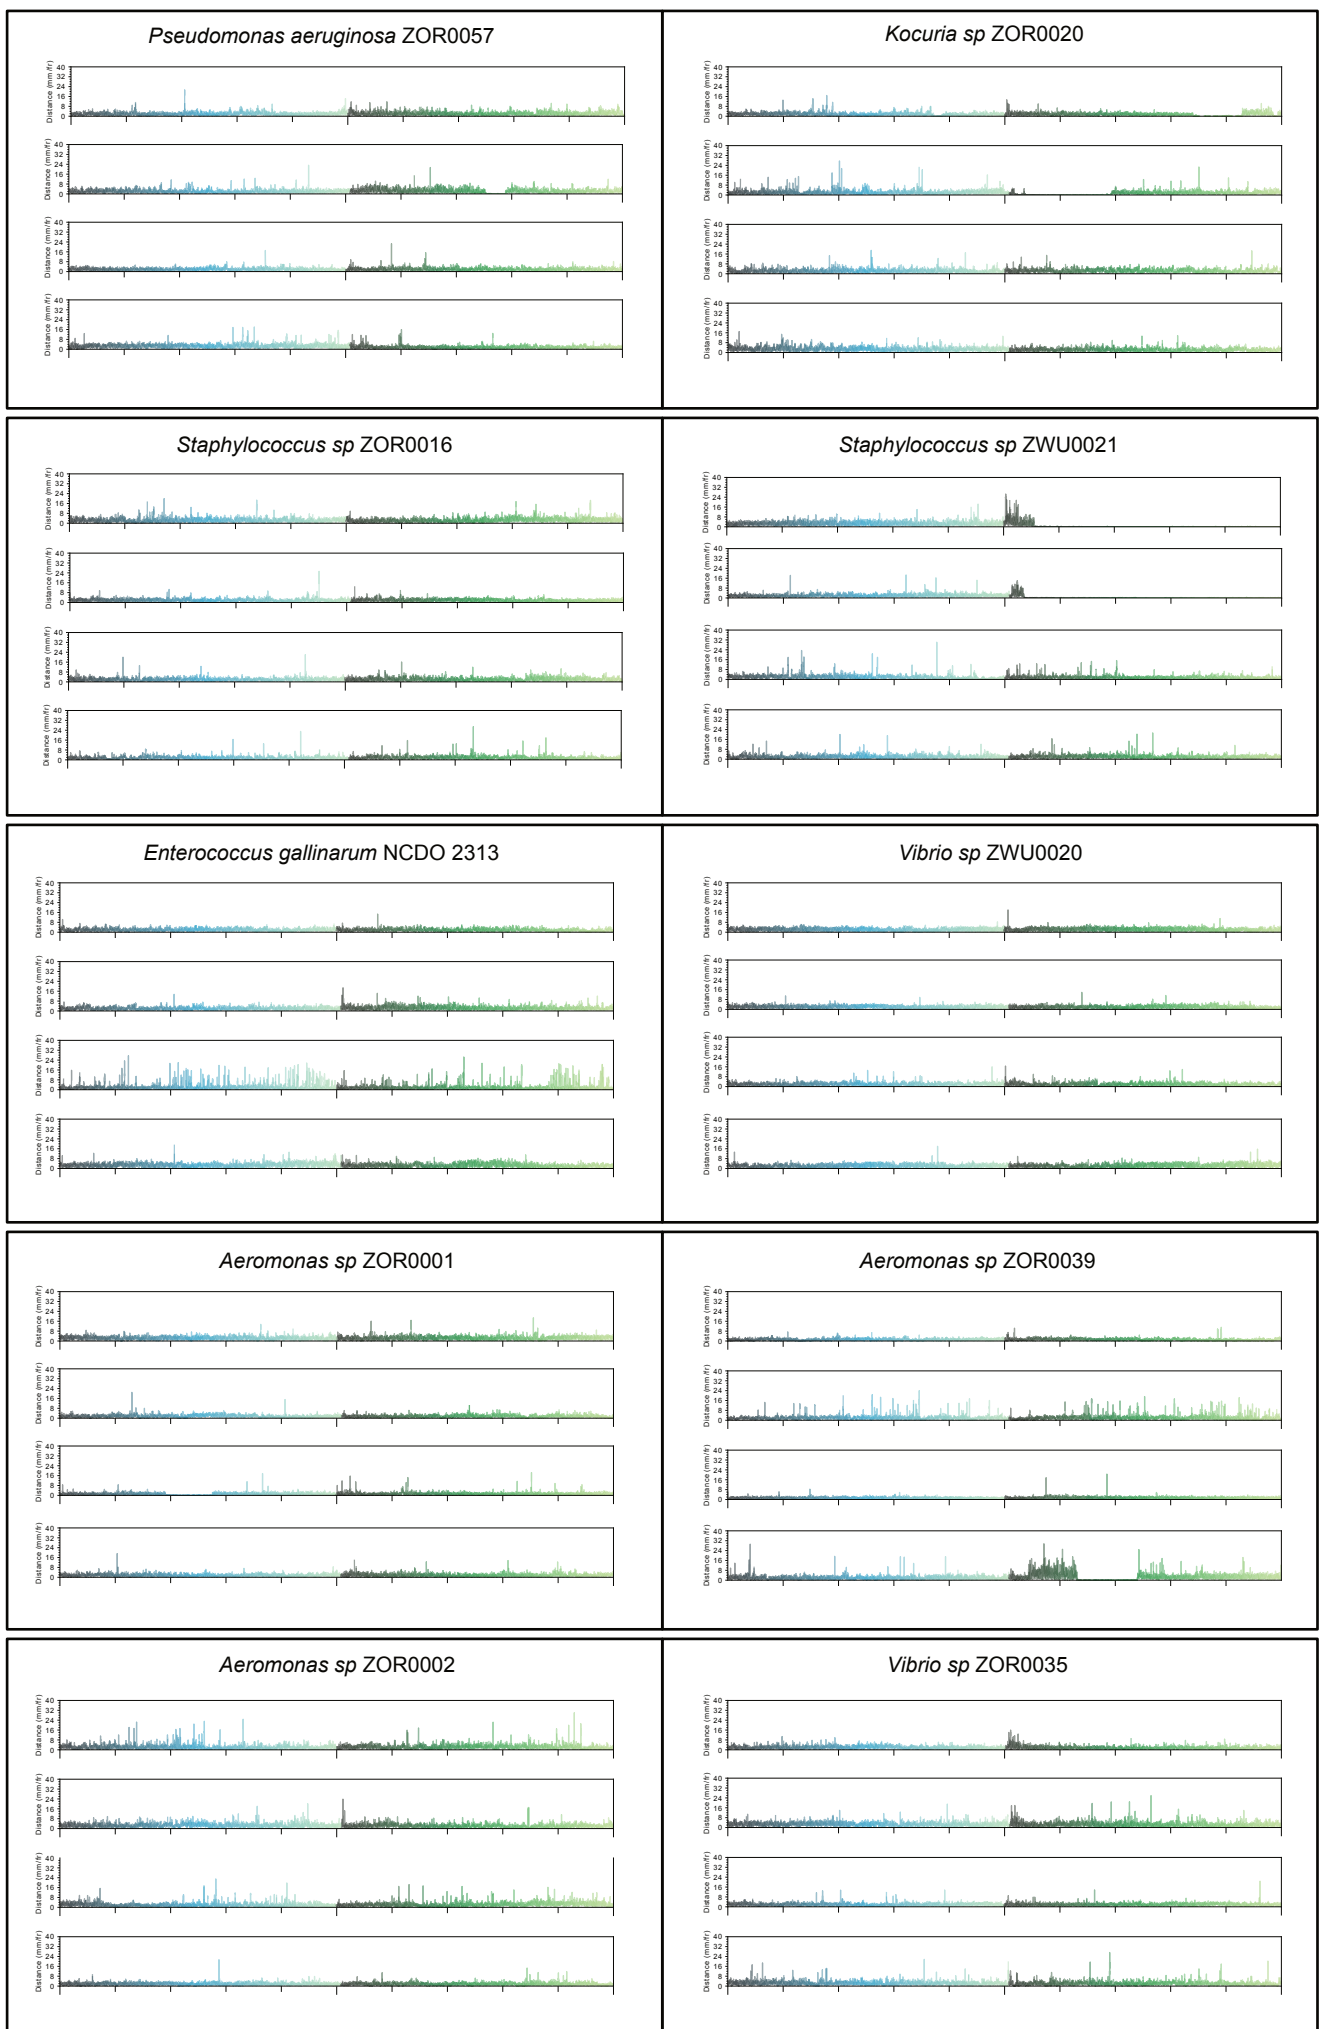

**Supplementary Fig. 5. Effect of bacterial lysate on fish speed.** Traces showing the speed of 4 fish exposed to each sample. The bacterial lysate was introduced after 5 minutes, and the fish were recorded for a further 5 minutes. Traces are colour-coded according to time.

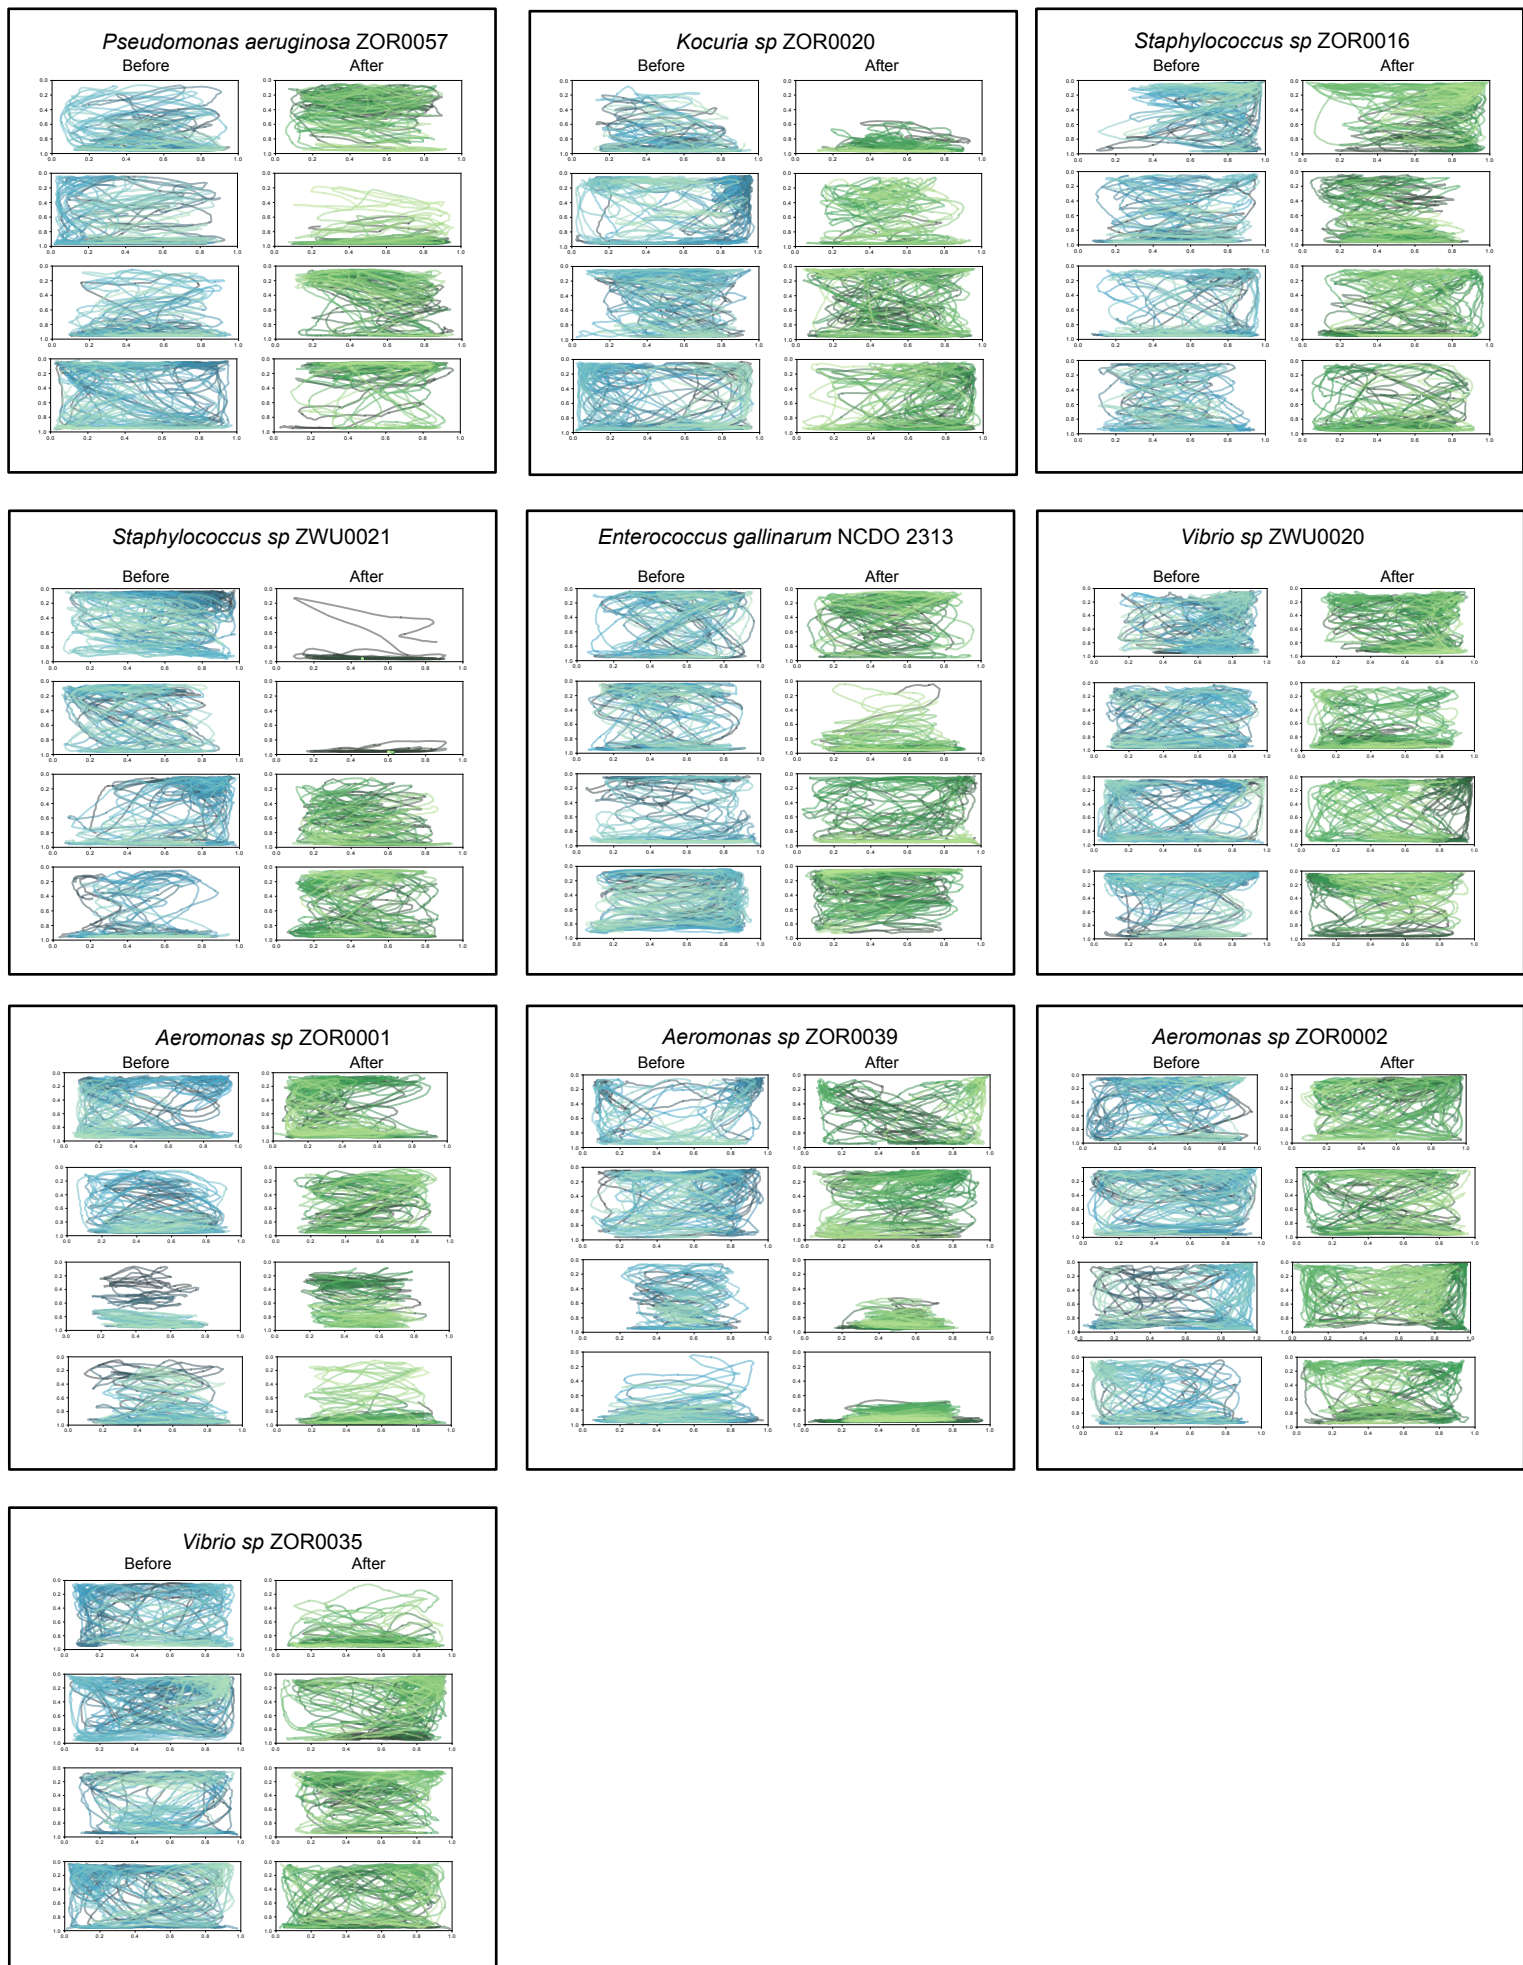

**Supplementary Fig. 6. Effect of bacterial lysate on vertical position.** Traces showing the position of fish before (left trace) and after (right trace) delivery of bacterial lysate. 4 fish were tested with each lysate. Traces are colour coded according to time, with the same LUT used in Supplementary Fig.5.

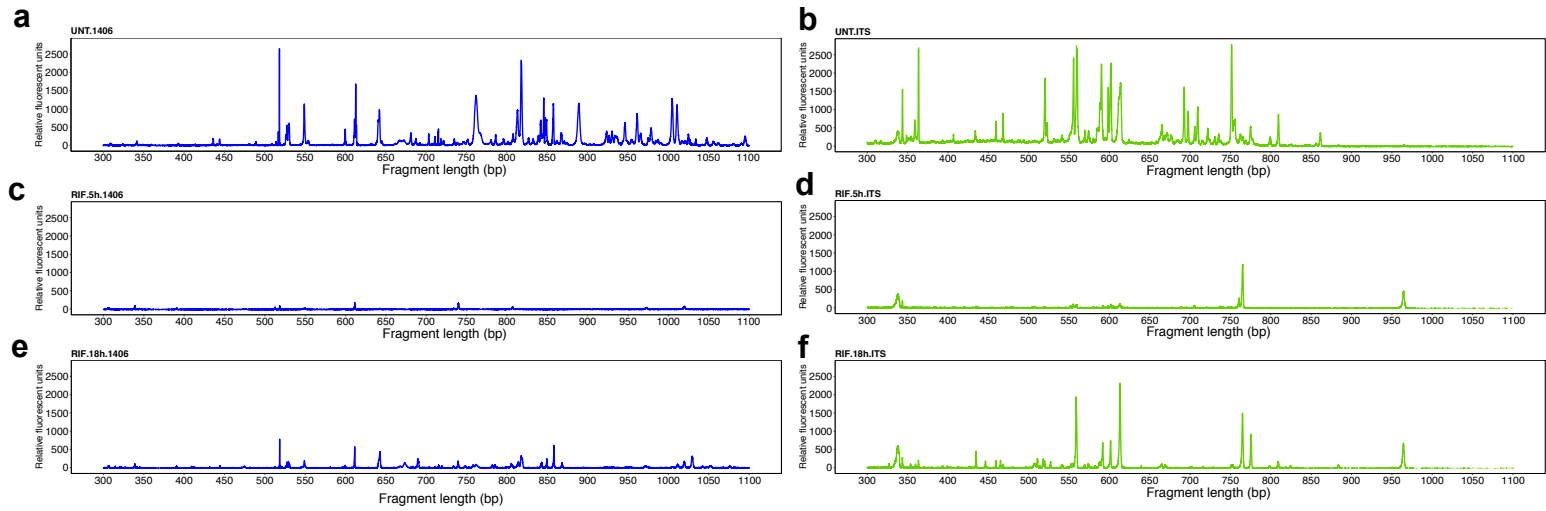

**Supplementary Fig. 7. Transient reduction of skin bacteria with antibiotic treatment. a-f.** ARISA of swabs from zebrafish skin, with the 1406f/26Sr (a, c, e) and ITSf/ITSReub (b, d, f) primers. **a, b.** Multiple peaks were detected before treatment with the antibiotic rifampicin. **c, d.** 5 hours after treatment, most peaks were absent. **e, f.** 18 hours after the start of treatment, peaks were detected again.

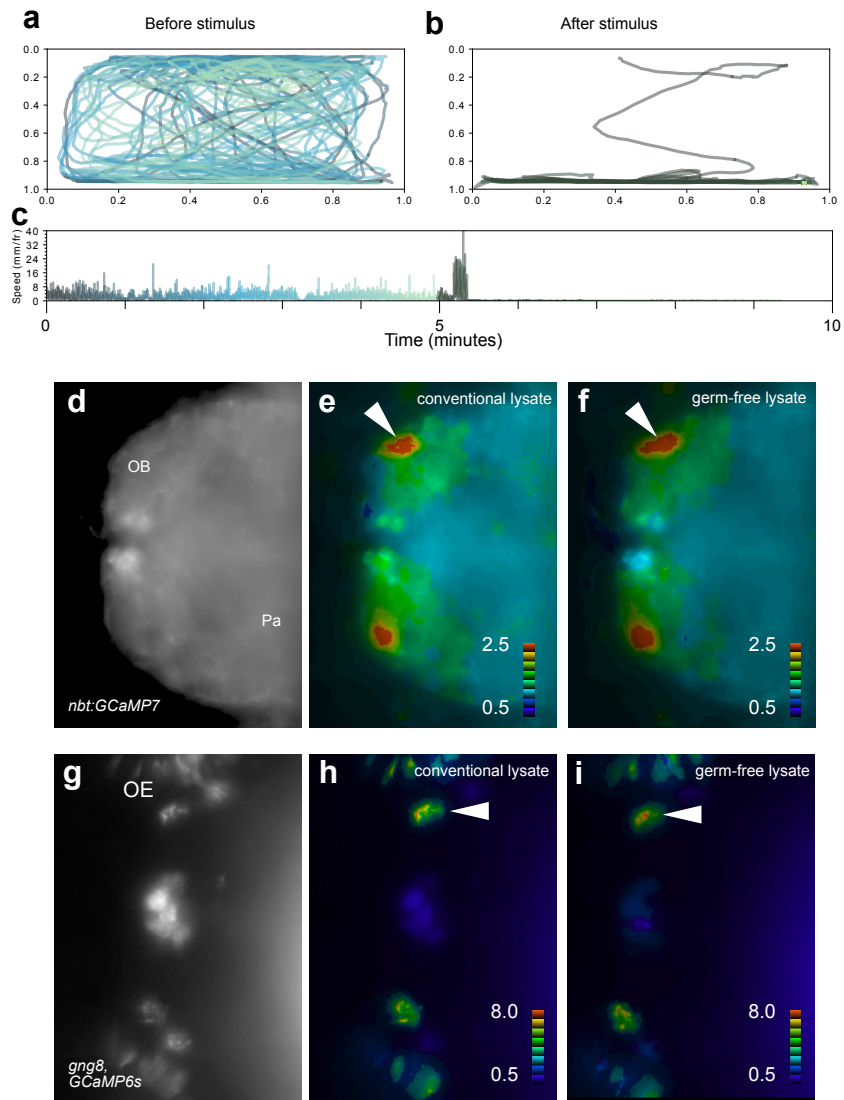

**Supplementary Fig. 8 Response to lysate from larval zebrafish.** **a-c.** Response of an adult zebrafish to lysate from 7 dpf larvae. **a, b.** Position of the fish, as viewed from the side, before (a) and after (b) delivery of the larval lysate. **c.** Speed of the fish. There is an increase in speed, followed by freezing, after lysate delivery at the 5-minute time point. **d-f.** The anterior forebrain of a larvae with broad expression of jGCaMP7f. Lysate from conventionally grown (e) and germ-free (f) fish both strongly activate a single glomerulus in the dorso-lateral bulb (arrowhead), as indicated by the high  $f/f_0$  ratio in only one region of the bulb. **g-i.** A larvae expressing a calcium indicator under the control of the *gng8*:GAL4 driver. Lysate from conventionally grown (h) and germ-free (i) larvae both strongly activate OSNs terminating in a single glomerulus in the dorso-lateral bulb (arrowhead). Panels d and g show the average of the time-series; Panels e, f, h and i show the panel with the maximum increase in fluorescence following delivery of the stimulus. All images are dorsal view, with anterior to the left. The wedge indicates the look-up table used, with the numbers indicating the change in fluorescence relative to baseline. OE: olfactory epithelium; OB: olfactory bulb.
